# Supplementary material for: FARPA-based tube array coupled with quick DNA extraction enables ultra-fast bedside detection of antibiotic-resistant pathogens
Source: Royal Society of Chemistry journal article supplement (doi:10.1039/d4an00185k), 2024-01-01
Supplement: d4an00185k1.pdf [file d4an00185k1.pdf]

**Table S1 Information of recombinant plasmids**

| Targets              | NCBI accession number | Sequence of synthesized plasmids                                                                                                                                                                                                                                                                                                                                                                                                                    |
|----------------------|-----------------------|-----------------------------------------------------------------------------------------------------------------------------------------------------------------------------------------------------------------------------------------------------------------------------------------------------------------------------------------------------------------------------------------------------------------------------------------------------|
| <i>E. coli</i>       | AF28036               | TATCTGACAACAGGCATGACGGTGGCGGAGCTGTCCGC<br>GGCCGCCGTGCAATACAGTGATAACGCCGCCCAATTT<br>GTTGCTGAAGGAGTTGGGCGGCCCGGGCTGACGG<br>CCTTCATGCGCTCTATCGGCGATAACCAGTTCCGTCTGG<br>ACCGCTGGGAGCTGGAGCTGAACTCCGCCATCCCAGGC<br>GATGCGCGGATACCTCATCGCCGCGCGCCGTGACGGA<br>AAGCTTACAAAACACTGACACTGGGCTCTGCACTGGCTGC<br>GCCGCAGCGGCAGCAGTTTGTGATTGGCTAAAGGGAA<br>ACACGACCGGCAACCACCGCATCCGCGCGGGGTGCCG<br>GCAGACTGGGCAGTCGGAGACAAAACCGGAACCTGCGG<br>AGTGTATGGCACGGCAAATG |
| <i>K. pneumoniae</i> | AF293352              | ACCAGCAGACGAACCTCCTGCTCGGTGTTATTGAGAAA<br>AGTGTGGCAGATACCGGTACCCGCGGGAAAACCCACGC<br>TGTCGCCCGGCTCCAGCTTCCAGAGATAGCCGTTTATCC<br>ACACTTCCGGATAGCCCTCCAGCACGTAGATGAACTCTT<br>CCTCATCGCTCTCCGCGTGCGGGTACGAGGTGCGCCGCC<br>CGGGCGGCAGTCGCTCGTGGTGGATCCCCAGCCGGTTG<br>AGACGTAAACCGCGCCCCAGCGGCGCCAATCGAAAA<br>ACGCTCCGGGCTGTCGGGATAAGTGGCATCGTCGGGCC<br>CTTCCAGTTCGCGCCAGTGGCGAATGCAATCAGGTCGTT<br>TCATCGTTTTCTCCCGAAAATGAGACACTTCAGATA                    |
| <i>E. faecium</i>    | CP053704.1            | ACTTCGCTAACTTATAAGATAGACAAACGTACAAGTGTA<br>AATGATAGACATGTACATTTAAAAGCGGGGAAGCAATC<br>GCGCTTCTCCGCTTTTTTTGATAATAAGTTTATTCAGGA<br>GGAAATAAAAATGGCTAAGAAAACAGTGAAAGATATCGA<br>TTTAAAAGACAAAAAAGTTCTTGTCCGTGTTGACTTCAA<br>TGTTCCTTTGAAAGAGGCGTGATCACTGACGACACTCGT<br>ATCAAAGCAGCATTGCCAACAATCAACTACGTTTTAGAA<br>CAAGGCGGAAAAGCAATCCTTTTCTCTCACCTTGGACGT<br>GTAAAAACAGAAGAAGATAAAGAAGGAAAATCTTTAGC<br>TCCAGTTGCAAAAACGTCTAGGCGAATTATTAGGT                |
| <i>E. faecalis</i>   | NC_004668             | TACAGGAACACGTTGAGCAGCGCCATCTAATTTACCGTT<br>CAATTCTGGGATTACTAAGCCGATTGCTTTAGCAGCACC<br>AGTTGAGTTAGGTACGATGTTTGCAGCAGCAGCGCGCG<br>CACGACGGAAGTCGTGTCATTTGGTCACCTGTGTAAGCG                                                                                                                                                                                                                                                                             |

**Table S1 (Continued)**

| Targets            | NCBI accession number | Sequence of synthesized plasmids                                                                                                                                                                                                                                                                                                                                                                                                                                   |
|--------------------|-----------------------|--------------------------------------------------------------------------------------------------------------------------------------------------------------------------------------------------------------------------------------------------------------------------------------------------------------------------------------------------------------------------------------------------------------------------------------------------------------------|
| <i>E. faecalis</i> | NC_004668             | TGGATAGTTGTCATTAACCTTTAGGATGTGGTCCGTCT<br>AACCTTCAACAACACCAAAGTTGTCATGTAAAGCTTTAG<br>CCATTGGAGCTAAGCAGTTTGTAGTACAAGAAGCGCCT<br>GAAATTACAGTTTCTTCTCCAGTTAATGTTTCATGGTTTG<br>TGTTGTAAACGATTGTTGGTACATCGTTACCACCAGGAG<br>CTGAAATAACTACACGTTTTGCACCAGCAGTTAAAT                                                                                                                                                                                                         |
| <i>NDM</i>         | AP023238.1            | TGAATTCGCCCCATATTTTTGCTACAGTGAACCAAATTA<br>AGATCATCTATTTACTAGGCCTCGCATTTCGCGGGTTTTT<br>AATGCTGAATAAAAGGAAAACCTTGATGGAATTGCCCAA<br>TATTATGCACCCGGTCGCGAAGCTGAGCACCGCATTAGC<br>CGCTGCATTGATGCTGAGCGGGTGCATGCCCGGTGAAAT<br>CCGCCCGACGATTGGCCAGCAAATGGAAACTGGCGACC<br>AACGTTTTGGCGATCTGGTTTTCCGCCAGCTCGCACC<br>GAATGTCTGGCAGCACACTTCCTATCTCGACATGCCGGG<br>TTTCGGGGCAGTCGCTTCCAACGGTTTGATCGTCAGGGA<br>TGGCGGCCGCGTGCTGGTGGTCGATACCGCCTGGACCG<br>ATGACCAGACCGCCCAGATCCTC |
| <i>KPC</i>         | MT463290.1            | TATCTGACAACAGGCATGACGGTGGCGGAGCTGTCCGC<br>GGCCGCCGTGCAATACAGTGATAACGCCGCCGCAATTT<br>GTTGCTGAAGGAGTTGGGCGGCCCGGCCGGGCTGACGG<br>CCTTCATGCGCTCTATCGGCGATAACCAGTTCCGTCTGG<br>ACCGCTGGGAGCTGGAGCTGAACTCCGCCATCCCAGGC<br>GATGCGCGGATACTCATCGCCGCGCGCCGTGACGGA<br>AAGCTTACAAAACTGACACTGGGCTCTGCACTGGCTGC<br>GCCGCAGCGGCAGCAGTTTGTGATTGGCTAAAGGGAA<br>ACACGACCGGCAACCACCGCATCCGCGCGGGCGGTGCCG<br>GCAGACTGGGCAGTCGGAGACAAAACCGGAACCTGCCG<br>AGTGTATGGCACGGCAAATG            |

**Table S2** Primers and probes tested in this study.

| Name                      | Sequence (5'-3')                     |
|---------------------------|--------------------------------------|
| <i>E. coli</i> -F         | ATATGGCGGTGAGTATTATCGTCAGGAACAACATC  |
| <i>E. coli</i> -R         | GAGATGACCATTTGTCCGCATCAACATCTTTGTAG  |
| <i>K. pneumoniae</i> -F   | TTATCCCGACAGCCCGGAGCGTTTTTCGATTGG    |
| <i>K. pneumoniae</i> -R   | CAGCTTCCAGAGATAGCCGTTTATCCACACTTCCG  |
| <i>E. faecium</i> -F      | GGAAGCAATCGCGCTTCTTCCGCTTTTTTTGA     |
| <i>E. faecium</i> -R      | GCTTTGATACGAGTGTCTGTCAGTGATCACGCC    |
| <i>E. faecalis</i> -F     | CACGTTGAGCAGCGCCATCTAATTTACCGTTC     |
| <i>E. faecalis</i> -R     | GCTTAGCTCCAATGGCTAAAGCTTTACATG       |
| KPC-F (RPA)               | AACGCCGCGCCAATTTGTTGCTGAAGGAG        |
| KPC-R (RPA)               | TTCCCTTTAGCCAATCAACAAACTGCTGCCG      |
| NDM-F (RPA)               | AATATTATGCACCCGGTTCGCGAAGCTGAGC      |
| NDM-R (RPA)               | GCCCCGAAACCCGGCATGTCTGAGATAGGAA      |
| <i>E. coli</i> -UP1       | GATTACCCTGCTTGGCGGAT                 |
| <i>E. coli</i> -DP1       | ACGGACGCGGAGACCCGCTATGACAGT          |
| <i>E. coli</i> -UP2       | ATTACCCTGCTTGGCGGAAT                 |
| <i>E. coli</i> -DP2       | ACGGACGCGGAGCCCGCTATGACAGTTATC       |
| <i>E. coli</i> -UP3       | GGCGCGACGACGGGT                      |
| <i>E. coli</i> -DP3       | ACGGACGCGGAGCTTCCCGCAAGCAA           |
| <i>K. pneumoniae</i> -UP1 | TGCCGCCCCGGGCT                       |
| <i>K. pneumoniae</i> -DP1 | ACGGACGCGGAGGGCGCACCTCGTA            |
| <i>K. pneumoniae</i> -UP2 | CAGTCGCTCGTGGTGGAC                   |
| <i>K. pneumoniae</i> -DP2 | ACGGACGCGGAGTCCCCAGCCGG              |
| <i>K. pneumoniae</i> -UP3 | CCCGGGCGGGCGCT                       |
| <i>K. pneumoniae</i> -DP3 | ACGGACGCGGAGACCTCGTACCCGC            |
| <i>E. faecium</i> -UP1    | TCGATATCTTTCCTGTTTTCTTAGCCAC         |
| <i>E. faecium</i> -DP1    | ACGGACGCGGAGTTTTATTTCTCCTGAATAAACTT  |
| <i>E. faecium</i> -UP2    | AATAAGTTTATTCAGGAGGAAATAAAATGGCTT    |
| <i>E. faecium</i> -DP2    | ACGGACGCGGAGAAGAAAACAGTGAAAGATATCG   |
| <i>E. faecium</i> -UP3    | TTTATTCAGGAGGAAATAAAATGGCTAAGAAAAT   |
| <i>E. faecium</i> -DP3    | ACGGACGCGGAGCAGTGAAAGATATCGATTTAAAAG |
| <i>E. faecalis</i> -UP1   | AGCGCGCGCACGAT                       |
| <i>E. faecalis</i> -DP1   | ACGGACGCGGAGCGGAAGTCGTGTCATT         |
| <i>E. faecalis</i> -UP2   | AGTTTAAATGACAACCTATCCACGCTTT         |
| <i>E. faecalis</i> -DP2   | ACGGACGCGGAGACACAGGTGACCAAATG        |
| <i>E. faecalis</i> -UP3   | CATTTGGTCACCTGTGTAAGCGC              |
| <i>E. faecalis</i> -DP3   | ACGGACGCGGAGTGGATAGTTGTCATTAAACCT    |
| KPC-UP1                   | CGGCCTTCATGCGCTCTATT                 |
| KPC-DP1                   | ACGGACGCGGAGCGGGCGATAACCACG          |
| KPC-UP2                   | TAGAGCGCATGAAGGCCGC                  |
| KPC-DP2                   | ACGGACGCGGAGTCAGCCCCGCC              |

**Table S2 (Continued)**

| Name               | Sequence (5'-3')                                            |
|--------------------|-------------------------------------------------------------|
| <i>KPC-DP3</i>     | ACGGACGCGGAGGAAGGCCGTCAGC                                   |
| <i>NDM-UP1</i>     | GCACCGCATTAGCCGCTT                                          |
| <i>NDM-DP1</i>     | ACGGACGCGGAGGCATTGATGCTGAGC                                 |
| <i>NDM-UP2</i>     | CAGCATCAATGCAGCGGCC                                         |
| <i>KPC-F (PCR)</i> | CATTCAAGGGCTTTCTTGCTGC                                      |
| <i>KPC-R (PCR)</i> | ACGACGGCATAGTCATTTGC                                        |
| <i>NDM-F</i>       | GGTTTGGCGATCTGGTTTTTC                                       |
| <i>NDM-R</i>       | CGGAATGGCTCATCACGATC                                        |
| <i>FAM-HP</i>      | FAM-TCTT (BHQ1) AGCCGGTTTTCCGGCTA<br>AGACTCCGCGTCCGT-C6-NH2 |

**Table S3** DNA concentration of 4 kinds of pathogens from 24 urinary samples quantified by qPCR

| Pathogens            | Ct    | The linear regression equation | Concentration range (copies/ $\mu$ L) |
|----------------------|-------|--------------------------------|---------------------------------------|
| <i>E. coli</i>       | 18.84 | $y = -3.737x + 37.224$         | 9437.25~131061.13                     |
|                      | 18.1  |                                |                                       |
|                      | 21.5  |                                |                                       |
|                      | 20.14 |                                |                                       |
|                      | 22.37 |                                |                                       |
|                      | 19.11 |                                |                                       |
| <i>K. pneumoniae</i> | 19.13 | $y = -3.667x + 38.739$         | 4154.22~370093.94                     |
|                      | 18.32 |                                |                                       |
|                      | 25.47 |                                |                                       |
|                      | 20.56 |                                |                                       |
|                      | 18.79 |                                |                                       |
|                      | 21.24 |                                |                                       |
| <i>E. faecium</i>    | 25.22 | $y = -3.513x + 40.946$         | 1658.57~131048.91                     |
|                      | 28.17 |                                |                                       |
|                      | 22.53 |                                |                                       |
|                      | 27.48 |                                |                                       |
|                      | 24.39 |                                |                                       |
|                      | 28.84 |                                |                                       |
| <i>E. faecalis</i>   | 24.43 | $y = -3.304x + 40.398$         | 2792.94~174679.97                     |
|                      | 29.76 |                                |                                       |
|                      | 24.14 |                                |                                       |
|                      | 28.92 |                                |                                       |
|                      | 28.57 |                                |                                       |
|                      | 28.49 |                                |                                       |

Note: Four pathogens (*E. coli*, *K. pneumoniae*, *E. faecium*, and *E. faecalis*) each from 6 different urinary samples were randomly lysed using Quick extraction solution to perform qPCR.

**Table S4** Validation of *KPC* and *NDM* in 9 carbapenem-resistant urinary samples with qPCR assay

| Carbapenem-resistant urinary samples | Ct         |            |
|--------------------------------------|------------|------------|
|                                      | <i>KPC</i> | <i>NDM</i> |
| 1                                    | 16.13      | 36.07      |
| 2                                    | 21.56      | 37.22      |
| 3                                    | 24.33      | 39.94      |
| 4                                    | 19.78      | 37.45      |
| 5                                    | 16.47      | 40.15      |
| 6                                    | 25.55      | 38.58      |
| 7                                    | 15.92      | 39.87      |
| 8                                    | 18.95      | 16.74      |
| 9                                    | 37.82      | 36.46      |

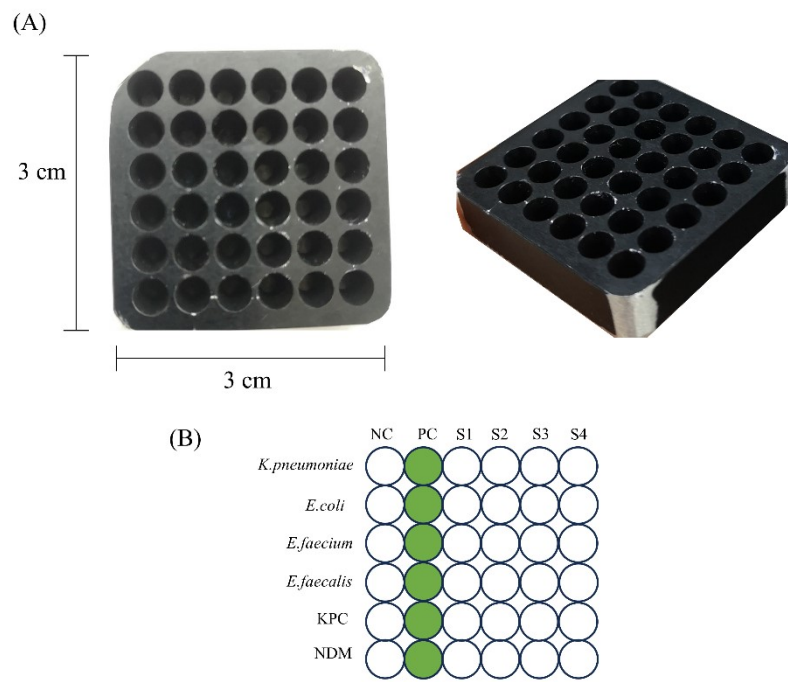

**Fig. S1** (A) Images of Aluminum thermal module with 36 pores. (B) Design of each location in 36-tube array for detection of multiple targets and multiple samples.

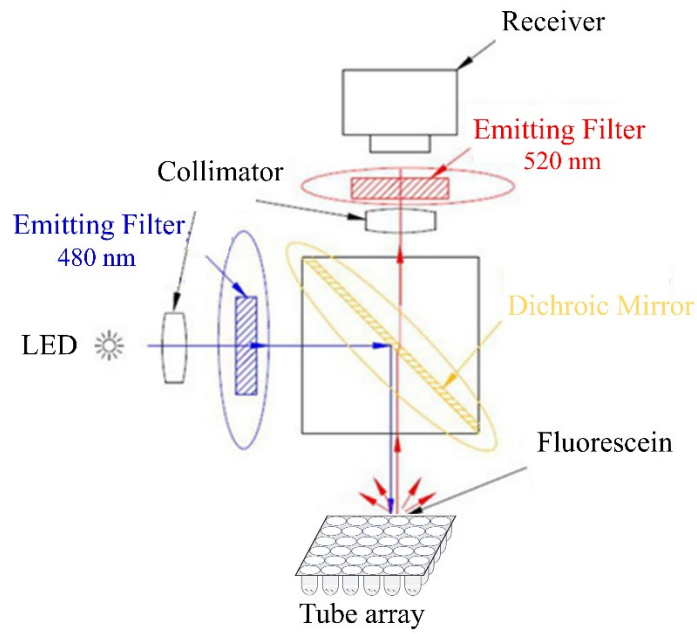

**Fig. S2** Working principle of handheld analyser for detecting fluorescence signal.



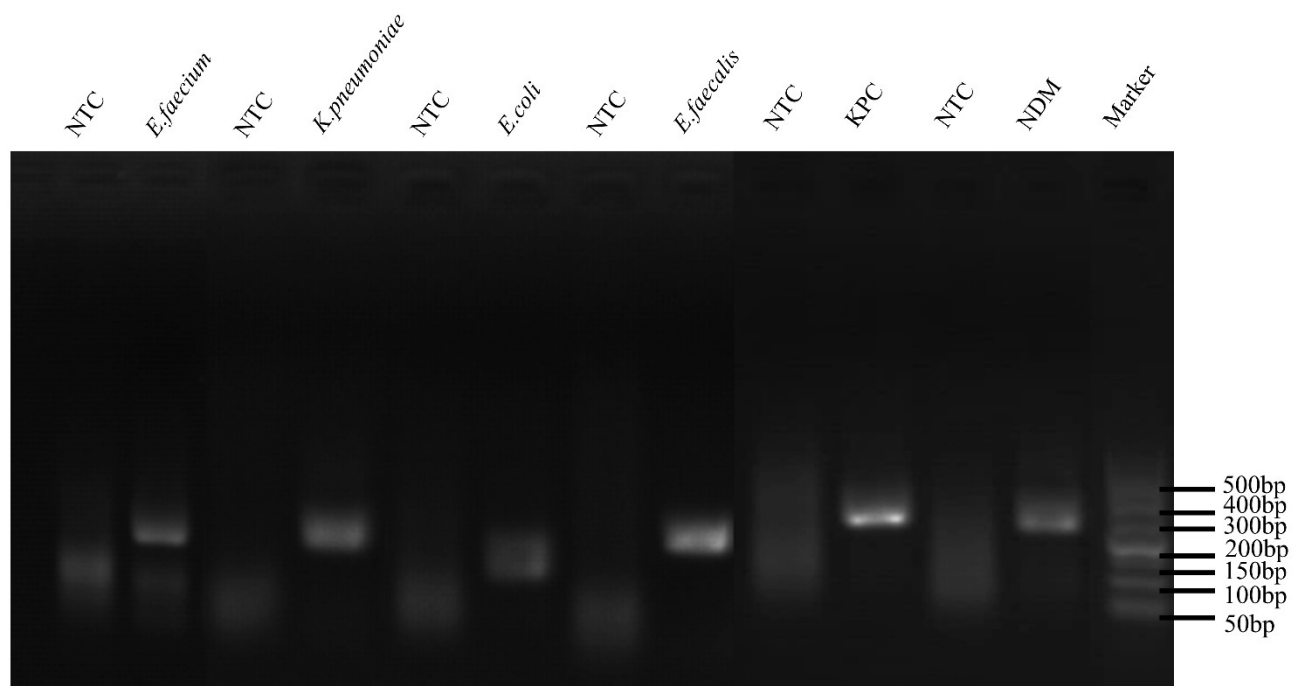

**Fig. S3** Images of agarose gel electrophoresis (2%) for RPA primers validation of *E. faecium*, *K. pneumoniae*, *E. coli*, *E. faecalis*, *KPC*, and *NDM*. NTC is negative control without template. Lane Marker is DNA ladder.

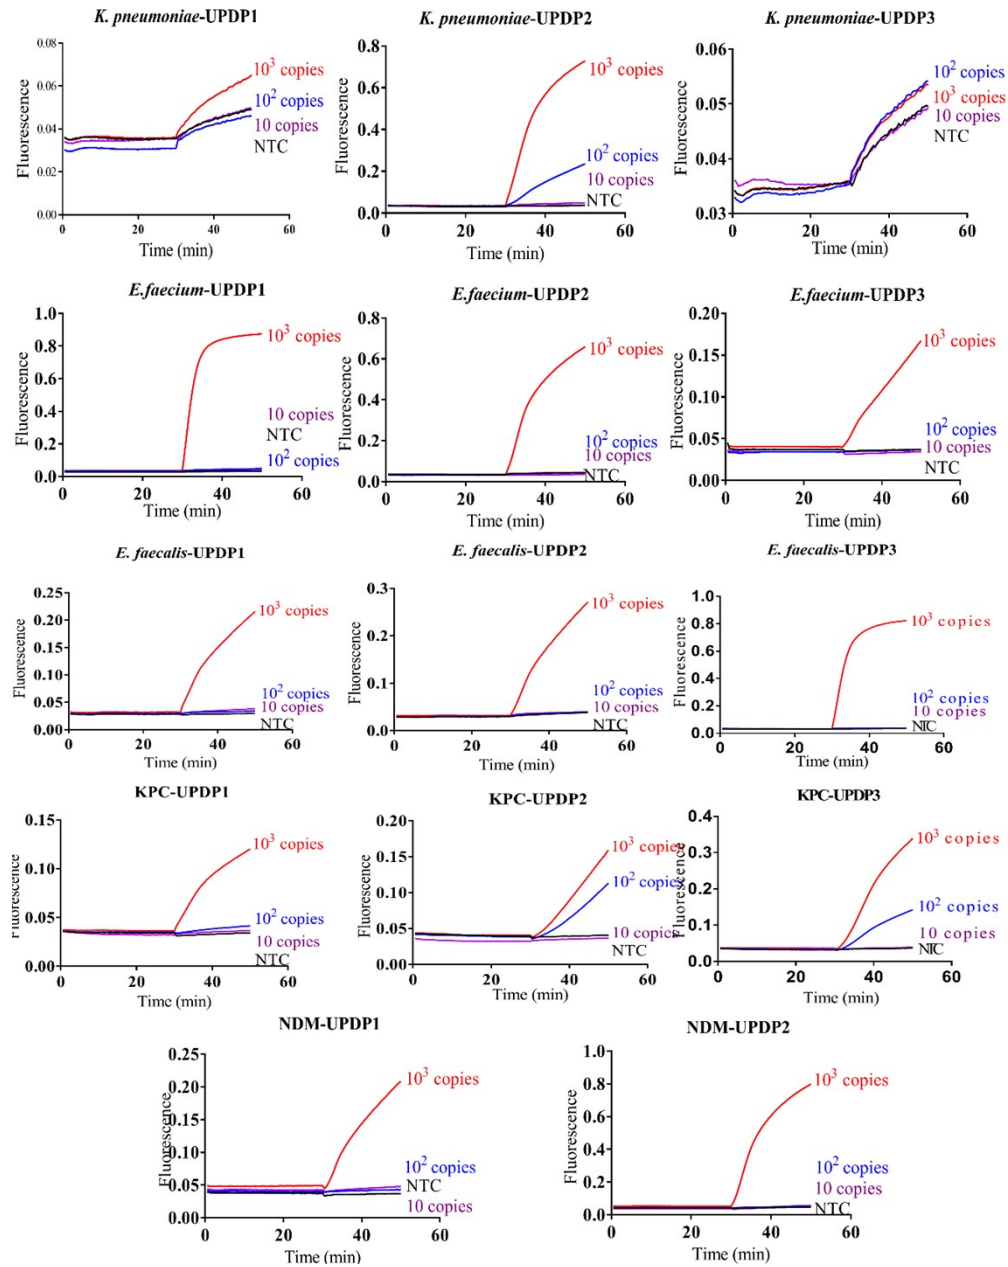

**Fig. S4** Fluorescent profile of screening for optimum invasive probe. (*K. pneumoniae*, *E. faecium*, *E. faecalis*, *KPC*, *NDM*). We chose *E. faecium*-UP1 and DP1, *K. pneumoniae*-UP2 and DP2, *NDM*-UP and DP2, *E. faecalis*-UP3 and DP3, *KPC*-UP3 and DP3 as the invasive probes for subsequent experiments.

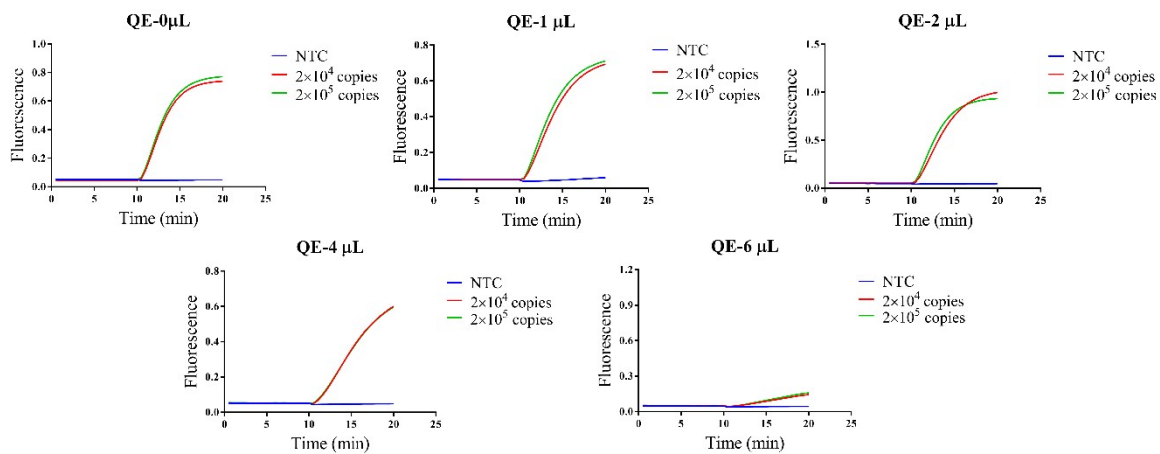

**Fig. S5** The fluorescent profile of adding different volumes (0, 1, 2, 4, 6  $\mu\text{L}$ ) of QE extraction solution into the FARPA reaction system for detecting known concentration ( $2 \times 10^4$ ,  $2 \times 10^5$  copies/reaction) of the recombinant plasmid of *E. coli*.

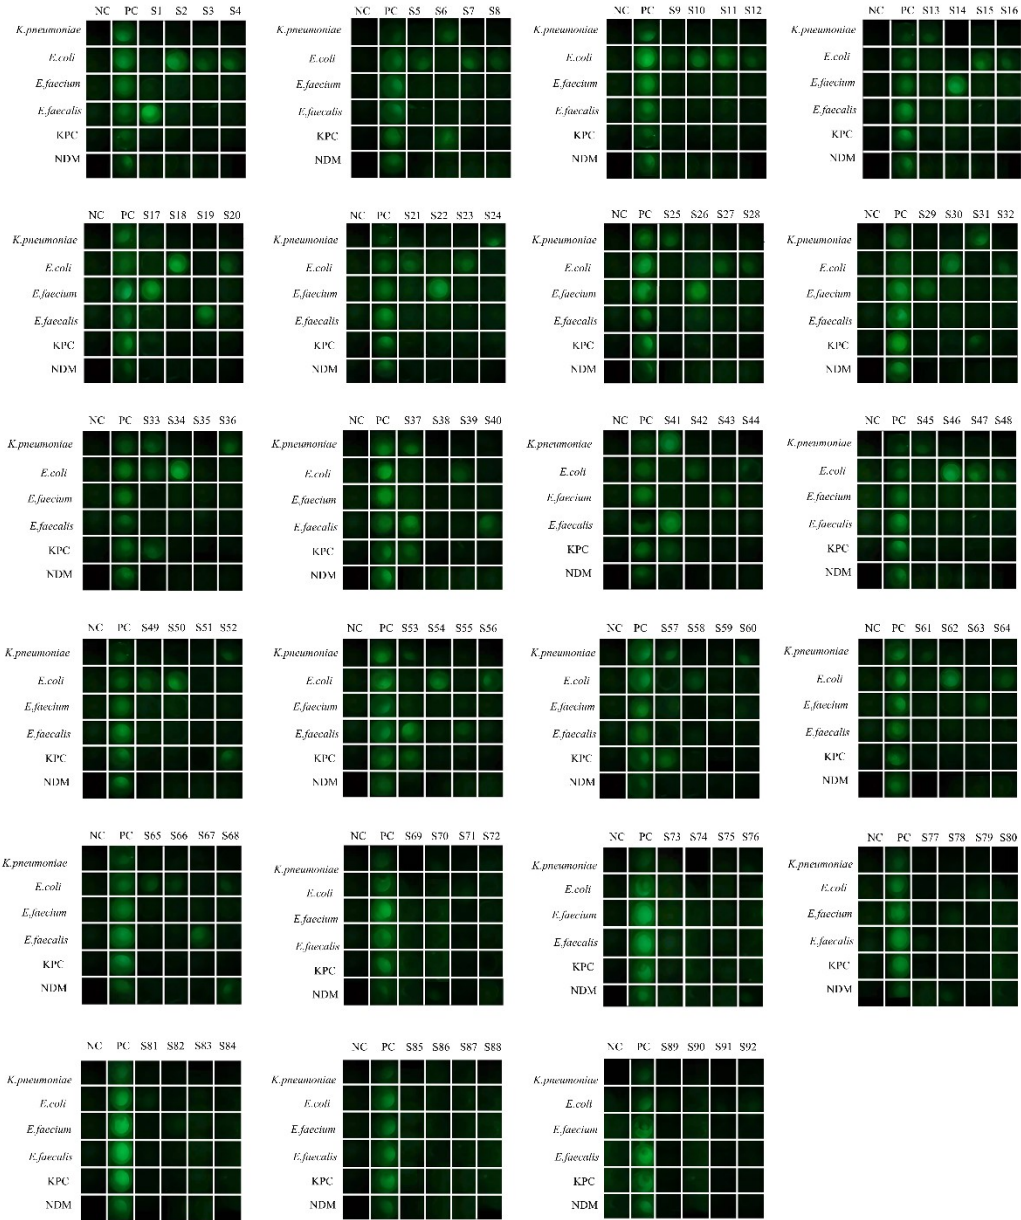

**Fig. S6** Fluorescent images of FARPA-based tube array for detecting 92 clinical urinary samples. NC is the negative control without any target. PC is the positive control with  $2 \times 10^5$  copies/reaction recombinant plasmids of each target.

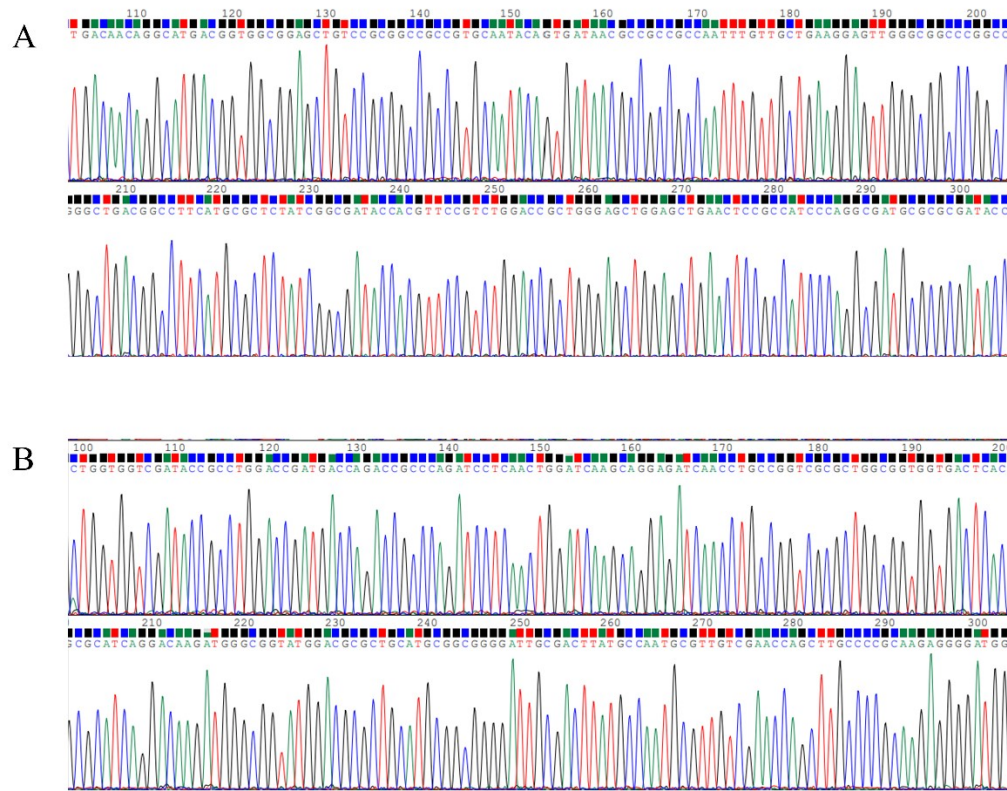

**Fig. S7** The results of Sanger sequencing for 8 strains of *K. pneumoniae* carrying *KPC* resistant gene (A) and 1 strain of *E. coli* carrying *NDM* resistant gene (B).
